# Supplementary material
Source: PubMed Central journal article supplement (PMC6648403)
Supplement: ao8b03200_si_001.pdf [file ao8b03200_si_001.pdf]

## Supporting Information to

### Systematic Enumeration of Elementary Reaction Steps in Surface Catalysis

Johannes T. Margraf<sup>†,\*</sup> and Karsten Reuter<sup>†</sup>

<sup>†</sup>Chair for Theoretical Chemistry and Catalysis Research Center, Technische Universität München, Lichtenbergstr. 4, D-85747 Garching, Germany.

\*johannes.margraf@ch.tum.de

## Data Description

The data described is hosted at [rnet.theo.ch.tum.de](http://rnet.theo.ch.tum.de). The  $[\text{CHO}]_{1-4}$  molecule datasets are provided as numbered lists of SMILES strings. For technical reasons an “empty” molecule ( $[\text{x}]$ ) is included as the last entry in each list. Reaction datasets are provided as numbered lists of reactions for each  $[\text{CHO}]_n$  set. The number after each SMILES string corresponds to the numbering in the corresponding molecule list.

A python function for checking isomorphism of arbitrary SMILES strings is provided as a Jupyter notebook.
